# Supplementary material for: Genome-Wide Transcriptome Profiles of Rice Hybrids and Their Parents
Source: MDPI journal article supplement (doi:10.3390/ijms151120833), 2014-11-13
Supplement: s1 [file s1]

# Supplementary Information

**Figure S1.** The number of genes that were detected by at least one read were indicated in RNA-seq.

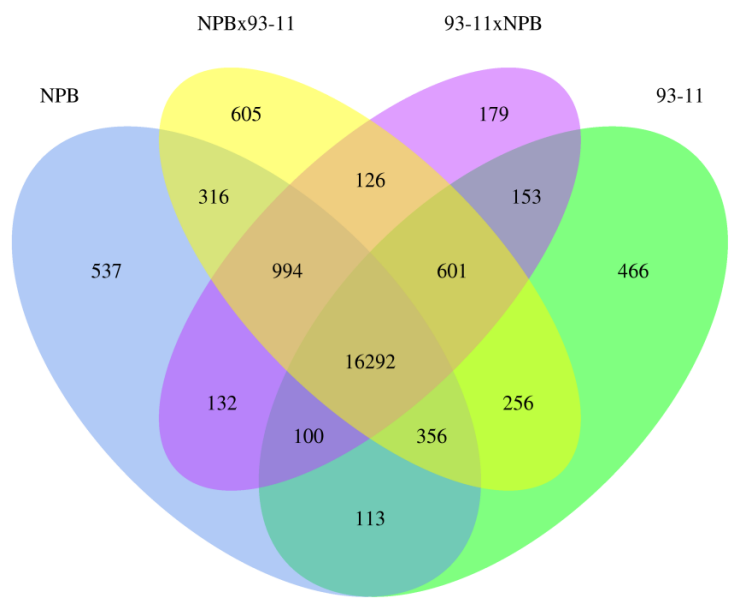

**Figure S2.** The number of differentially expressed genes (DEGs) identified between parent and hybrid. The number (2, 3, 4 and 5) indicates different groups of DEGs identified by pair-wise comparison between parent and hybrid: NPB *vs.* NPB  $\times$  93-11, NPB *vs.* 93-11  $\times$  NPB, 93-11 *vs.* NPB  $\times$  93-11 and 93-11 *vs.* 93-11  $\times$  NPB, respectively.

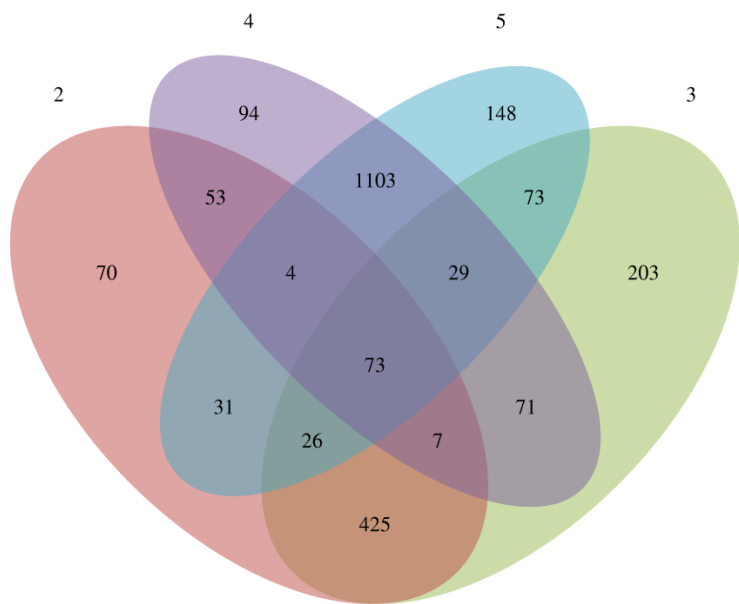

**Figure S3.** Distribution of gene ontology (GO) terms that were assigned to DEGs between the parent and hybrid.

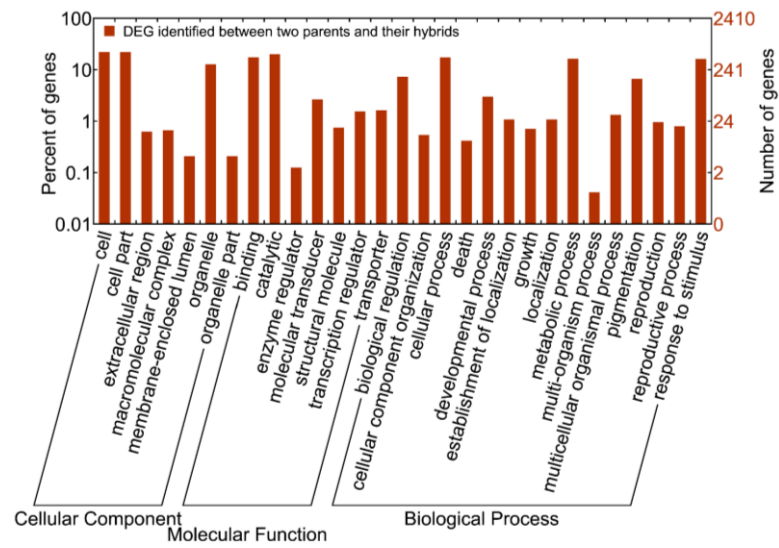

**Figure S4.** Number of DEGs between the parent and hybrid in each of the co-expression modules.

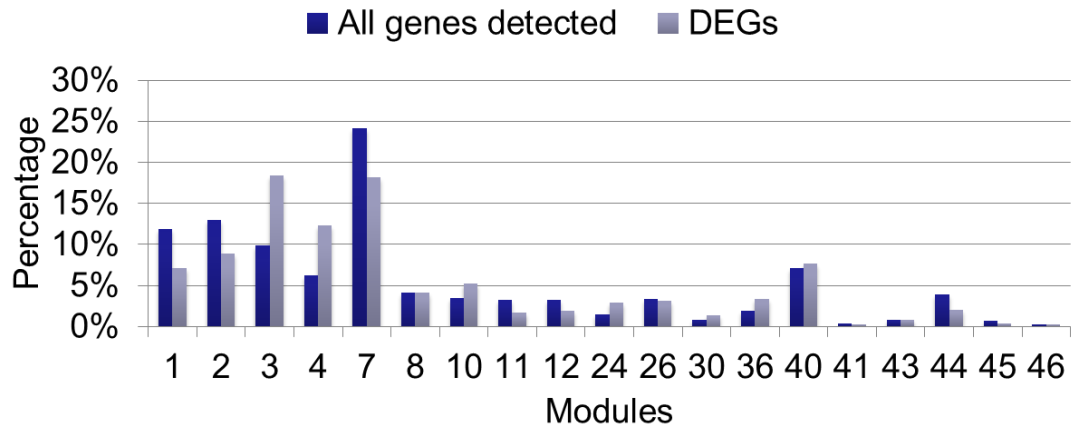

**Figure S5.** Histogram of ratios of maternal reads in reciprocal hybrids.

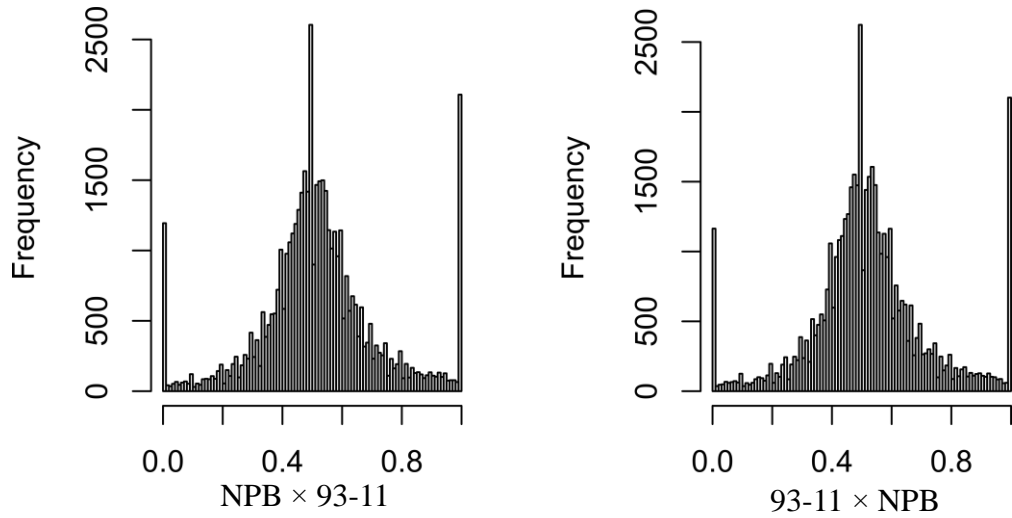

**Figure S6.** Number of transcription factors with allelic bias in hybrids for each transcription factor family.

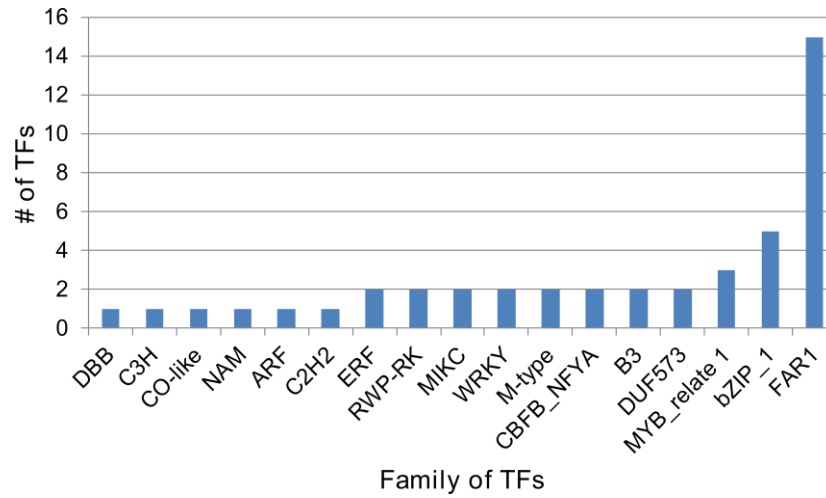

**Table S1.** Accession numbers of RNA-seq data used to estimate gene expression width.

| Accession | Tissues                                                            | Organism                    | Reference |
|-----------|--------------------------------------------------------------------|-----------------------------|-----------|
| SRS266811 | Oryza sativa,<br>Nipponbare 20 Day Leaves                          | Oryza sativa Japonica Group | [28]      |
| SRS266812 | Oryza sativa, Nipponbare<br>Emerging Inflorescence                 | Oryza sativa Japonica Group | [28]      |
| SRS266813 | Oryza sativa,<br>Nipponbare Early Inflorescence                    | Oryza sativa Japonica Group | [28]      |
| SRS266814 | Oryza sativa,<br>Nipponbare Anther                                 | Oryza sativa Japonica Group | [28]      |
| SRS266815 | Oryza sativa,<br>Nipponbare Pistil                                 | Oryza sativa Japonica Group | [28]      |
| SRS266816 | Oryza sativa,<br>Nipponbare Seed<br>5 Days After Pollination       | Oryza sativa Japonica Group | [28]      |
| SRS266817 | Oryza sativa,<br>Nipponbare Embryo<br>25 Days After Pollination    | Oryza sativa Japonica Group | [28]      |
| SRS266818 | Oryza sativa,<br>Nipponbare Endosperm<br>25 Days After Pollination | Oryza sativa Japonica Group | [28]      |
| SRS266819 | Oryza sativa,<br>Nipponbare Seed<br>10 Days After Pollination      | Oryza sativa Japonica Group | [28]      |
| SRS266820 | Oryza sativa,<br>Nipponbare Endosperm<br>25 Days After Pollination | Oryza sativa Japonica Group | [28]      |
| SRS266821 | Oryza sativa,<br>Nipponbare 20 Day Leaves                          | Oryza sativa Japonica Group | [28]      |
